# Supplementary material for: Reconstruction and flux analysis of coupling between metabolic pathways of astrocytes and neurons: application to cerebral hypoxia
Source: Springer Nature journal article supplement (doi:10.1186/1742-4682-4-48), 2007-12-01
Supplement: Additional file 2 [file 1742-4682-4-48-s2.pdf]

**Supplementary Table 1.a:** Metabolic differences in two cell types reflected in our model for pathway (internal) reactions

| Reaction/ Enzyme                                 | Reaction Number in astrocytes                          | Reaction Number in neurons         | Coupling/ Differentiation                                                                                                                    |
|--------------------------------------------------|--------------------------------------------------------|------------------------------------|----------------------------------------------------------------------------------------------------------------------------------------------|
| Lactate dehydrogenase                            | r <sub>11</sub>                                        | -                                  | only active in astrocytes                                                                                                                    |
| pyruvate carboxylation                           | r <sub>12</sub>                                        | -                                  | only active in astrocytes                                                                                                                    |
| cytosolic malate dehydrogenation                 | r <sub>32</sub>                                        | r <sub>68</sub>                    | The one in neurons is in reverse direction of the mitochondrial reaction, thereby mimicking malate-aspartate shuttle active in neurons       |
| malic enzyme                                     | r <sub>33</sub>                                        | r <sub>69</sub>                    | cytosolic in astrocytes, mitochondrial in neurons                                                                                            |
| glutamine synthetase                             | r <sub>77</sub>                                        | -                                  | only active in astrocytes                                                                                                                    |
| glutaminase                                      | -                                                      | r <sub>79</sub>                    | only active in neurons                                                                                                                       |
| glutamate decarboxylase                          | -                                                      | r <sub>80</sub>                    | only active in neurons                                                                                                                       |
| 3-phosphoglycerate dehydrogenase                 | r <sub>92</sub>                                        | -                                  | only active in astrocytes                                                                                                                    |
| serine dehydratase                               | r <sub>93</sub>                                        | -                                  | only active in astrocytes                                                                                                                    |
| glycine cleavage system                          | r <sub>97</sub>                                        | -                                  | only active in astrocytes                                                                                                                    |
| branched-chain keto-acid dehydrogenase           | r <sub>100</sub> , r <sub>108</sub> , r <sub>115</sub> | -                                  | only active in astrocytes                                                                                                                    |
| branched-chain acyl-coa dehydrogenase            | r <sub>101</sub> , r <sub>109</sub> , r <sub>116</sub> | -                                  | only active in astrocytes                                                                                                                    |
| lysine catabolism                                | -                                                      | r <sub>120</sub> -r <sub>123</sub> | only active in neurons                                                                                                                       |
| phenylalanine catabolism                         | -                                                      | r <sub>125</sub> -r <sub>129</sub> | only active in neurons                                                                                                                       |
| tyrosine catabolism                              | -                                                      | r <sub>132</sub> -r <sub>134</sub> | only active in neurons                                                                                                                       |
| acetylcholine metabolism                         | -                                                      | r <sub>135</sub>                   | only active in neurons                                                                                                                       |
| cholesterol synthesis                            | r <sub>136</sub>                                       | -                                  | only active in astrocytes. Astrocytes supply necessary cholesterol to neurons.                                                               |
| Arachidonate and Decosahexenoate synthesis       | r <sub>141</sub> , r <sub>142</sub>                    | -                                  | only active in astrocytes. Astrocytes supply these fatty acids to neurons.                                                                   |
| cytosolic glycerol 3-phosphate dehydrogenase     | r <sub>150</sub>                                       | -                                  | only active in astrocytes                                                                                                                    |
| mitochondrial glycerol 3-phosphate dehydrogenase | r <sub>151</sub>                                       | r <sub>158</sub>                   | The one in astrocytes is in reverse direction of the cytosolic reaction, thereby mimicking glycerol 3-phosphate shuttle active in astrocytes |
| cystine reductase                                | r <sub>167</sub>                                       | -                                  | only active in astrocytes                                                                                                                    |
| glycogen phosphorylase                           | r <sub>183</sub> , r <sub>184</sub>                    |                                    | only active in astrocytes in stress conditions                                                                                               |

**Supplementary Table 1.b:** Metabolic differences in two cell types reflected in our model for exchange reactions

|                       |                           |
|-----------------------|---------------------------|
| Lactate release       | only active in astrocytes |
| glutamine release     | only active in astrocytes |
| Dopamine release      | only active in neurons    |
| epinephrine release   | only active in neurons    |
| serotonin release     | only active in neurons    |
| melatonin release     | only active in neurons    |
| acetylcholine release | only active in neurons    |
| linoleate uptake      | only active in astrocytes |
| linolenate uptake     | only active in astrocytes |
| cystine uptake        | only active in astrocytes |
| leucine uptake        | only active in astrocytes |
| isoleucine uptake     | only active in astrocytes |
| valine uptake         | only active in astrocytes |
| tyrosine uptake       | only active in neurons    |
| lysine uptake         | only active in neurons    |
| phenylalanine uptake  | only active in neurons    |
| ammonia uptake        | only active in astrocytes |
| Glycogen breakdown    | only active in astrocytes |
